# Supplementary material for: The ERG-Regulated LINC00920 Promotes Prostate Cancer Cell Survival via the 14-3-3ϵ–FOXO Pathway
Source: Oxford University Press journal article supplement (doi:10.1158/1541-7786.mcr-20-0021), 2020-07-09
Supplement: 15417786mcr200021-sup-235197_2_supp_6377463_qcdpvf.xlsx [file 15417786mcr200021-sup-235197_2_supp_6377463_qcdpvf.xlsx]

## Sheet: Table S2
Supplementary Table S2. Degenerate and gene-specific primer (GSP) oligos used for 5’- and 3’- rapid amplification of cDNA ends (RACE).
Primer	Application	Forward sequence	Reverse sequence
		(5’→3’)	(5’→3’)
GeneRacer™ 5′ Primer	5’ RACE	CGACTGGAGCACGAGGACACTGA	N/A
GeneRacer™ 5′ Nested Primer	5’ RACE	GGACACTGACATGGACTGAAGGAGTA	N/A
GeneRacer™ 3′ Primer	3’ RACE	N/A	GCTGTCAACGATACGCTACGTAACG
GeneRacer™ 3′ Nested Primer	3’ RACE	N/A	CGCTACGTAACGGCATGACAGTG
LINC00920	5’ GSP1 RACE	N/A	CCCGTGTGATGGAAGAACTCTAAGATG
LINC00920 nested	5’ GSP2 RACE	N/A	GTTTTGCTTCAGGGCTGTTGTCACC
LINC00920	3’ GSP1 RACE	GGCCTCCCCAACATGCTCACCTGCT	N/A
LINC00920 nested	3’ GSP2 RACE	TGCCCAACTCATCTGGATCTTCCTTTG	N/A
