# Supplementary material for: The ERG-Regulated LINC00920 Promotes Prostate Cancer Cell Survival via the 14-3-3ϵ–FOXO Pathway
Source: Oxford University Press journal article supplement (doi:10.1158/1541-7786.mcr-20-0021), 2020-07-09
Supplement: 15417786mcr200021-sup-235197_2_supp_6377468_qcdpvf.xlsx [file 15417786mcr200021-sup-235197_2_supp_6377468_qcdpvf.xlsx]

## Sheet: Table S4
Supplementary Table S4. Sequences of biotinylated antisense ssDNA 20-mers used in chromatin isolation by RNA precipitation (ChIRP).
Oligo #	lacZ pool	LINC00920 pool
1	TGAATCCGTAATCATGGTCA	TGTTGCTTCCTTCCCTGTGA
2	CGCTATTACGCCAGCTGGCG	AGGCCTTTCCCTGCTCAGCC
3	CTCAGGAAGATCGCACTCCA	TCTAGGGAGGGCTGTTCTAG
4	CATCGTAACCGTGCATCTGC	CACTCTTCCCTATGCTTTGC
5	ATAATTCGCGTCTGGCCTTC	TGTTGTCACCAAGTTCTTAG
6	GACGGCAAACGACTGTCCTG	GTCTTATCTCCCAAGCCCTG
7	TCCAGATAACTGCCGTCACT	CACTTTGATTGTAGCTTTCA
8	ATCATCATTAAAGCGAGTGG	TGGAAGTGGGTCCTTCTCTA
9	GATAATTTCACCGCCGAAAG	GCCCTCAGTTCAACGGGCTG
10	AGTTTCGGGTTTTCGACGTT	TGGACTCTCTCTCTCGCAGG
11	CGACATCGCAGGCTTCTGCT	CAGGATGTCACTTCAGTGAT
12	TGACGGTTAACGCCTCGAAT	CTTGGGACTCATTTATAATG
13	GTGTACCACAGCGGATGGTT	CTCCAGCCCTGTGTAATCCC
14	GTTCGCTCATCGCCGGTAGC	TGAGAATTCCCGTGTGATGG
15	GATTAGCGCCGTGGCCTGAT	AGGCCTTCAGCTTAAGGAAT
16	GCAAATAATATCGGTGGCCG	GACAAACCCTGGGTTTATTA
17	TGGGCGTATTCGCAAAGGAT	TATAGTTCTTACTCCTCCAG
18	CAGACGAAGCCGCCCTGTAA	TCAATCAACCCTTACCTTCC
19	TCGTTCGGCGTATCGCCAAA	CCTGTATATTTATGTTGGGA
20	TTTGCCCGGATAAACGGAAC	GAGCCTGGAATATTTGTATA
21	GGAGCTCGTTATCGCTATGA	ATGAGAAGCCTTTGGGAAAA
22	CATGCGGTCGCGTTCGGTTG	CTTGAAAGAGGGAATGATTT
23	TGCCAACGCTTATTACCCAG	TATCGACAAGGCAGATAAAA
24	AGCGGTGCACGGGTGAACTG	GAGTTGGGCAAATTAACAAA
25	GTCAATGCGGGTCGCTTCAC	ACAGAGCCAGTGACAAAGGA
26	CACGCGTGAGCGGTCGTAAT	CAAAGGGTTTCATAAAGTTG
27	GGTAATCGCCATTTGACCAC	CACTTACTGTAGAATGCTTA
28	TTGCGGCCCTAATCCGAGCC	TCTCTTGATCCATCACTCAT
29	TTCGCTCGGGAAGACGTACG	GTTAGATGGTAACCAAGAAT
30	TGTTGACTGTAGCGGCTGAT	TTCTGAGACTTCCAATTCAT
