# Supplementary material for: The ERG-Regulated LINC00920 Promotes Prostate Cancer Cell Survival via the 14-3-3ϵ–FOXO Pathway
Source: Oxford University Press journal article supplement (doi:10.1158/1541-7786.mcr-20-0021), 2020-07-09
Supplement: 15417786mcr200021-sup-235197_2_supp_6377469_qcdpvf.xlsx [file 15417786mcr200021-sup-235197_2_supp_6377469_qcdpvf.xlsx]

## Sheet: Table S3
Supplementary Table S3. Small interfering RNAs (siRNAs) used in this study.
Target gene	Designation	Target sequence	Working concentration	Supplier
LINC00920	siRNA-Q2	CAGGGCTTGGGAGATAAGACA	10 nM (PC-3)	Qiagen
			35 nM (VCaP)
	siRNA-Q3	CTGGCCATTCCTTAAGCTGAA	10 nM (PC-3)	Qiagen
			35 nM (VCaP)
	siRNA-D1	AGTAAGAACTATAAGGCTA	35 nM (PC-3)	Dharmacon
	siRNA-D3	CCACAGAGTTGAATGAATT	35 nM (PC-3)	Dharmacon
	siRNA-D4	GGAAAGGCCTATAGACACA	35 nM (PC-3)	Dharmacon
ERG	siERG-7	CAGATCCTACGCTATGGAGTA	50 nM (VCaP)	Qiagen
	siERG-8	CTCCACGGTTAATGCATGCTA	50 nM (VCaP)	Qiagen
ETV4	siETV4-1	ATGGGCTATGGCTATGAGAAA	10 nM (PC-3)	Qiagen
	siETV4-8	CCGCTCGCTCCGATACTATTA	10 nM (PC-3)	Qiagen
Scrambled control	NTC	proprietary	as above	Qiagen
